# Supplementary material for: Multiple modes of Lrp4 function in modulation of Wnt/β-catenin signaling during tooth development
Source: Oxford University Press journal article supplement (doi:10.1242/dev.150680), 2017-07-11
Supplement: dev150680supp.pdf [file dev150680supp.pdf]

## SUPPLEMENTARY MATERIALS AND METHODS

### Generation of *Lrp4*<sup>LacZ</sup>, *Lrp4*<sup>ΔICD</sup>, *Lrp4*<sup>R1170W</sup> mice using the CRISPR/Cas9 technology

For an in-frame insertion of *LacZ* into the first exon of *Lrp4*, a donor plasmid was generated by capturing the *LacZ*-SV40*polyA* cassette and flanking regions from the *Lrp4*-*LacZ* BAC clone (Ahn et al., 2013). The resulting plasmid contains left and right homology arms from the *Lrp4* locus (2.3 kb and 1.0 kb, respectively). Germline transmission of the targeted allele was achieved by crossing a founder with wild-type C57BL/10JxCBA-F1 mice.

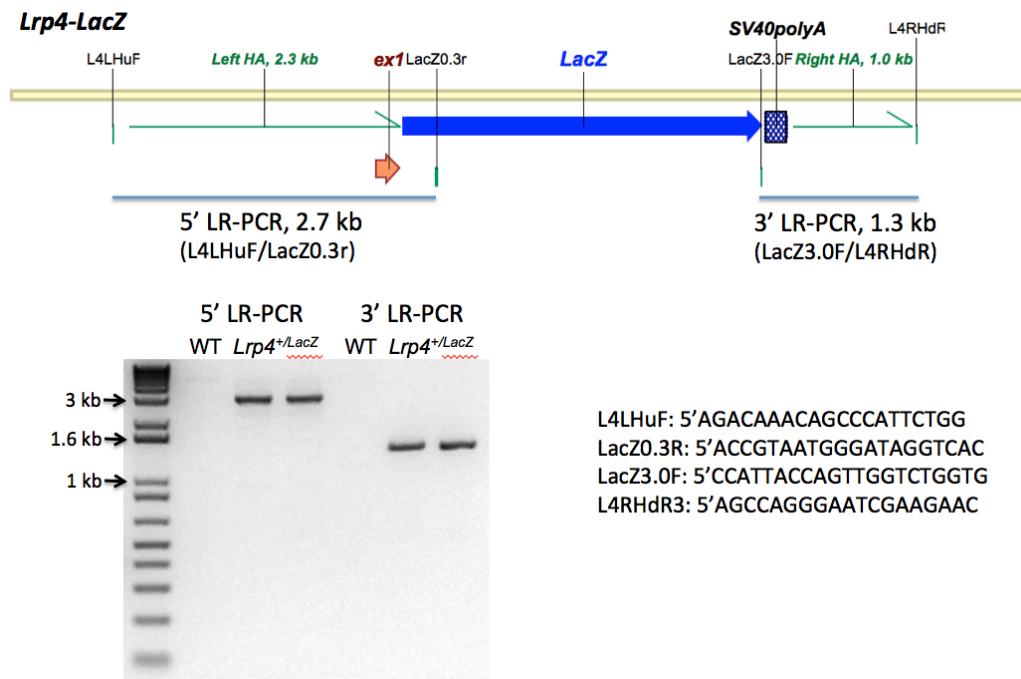

After successful germline transmission, correct targeting was confirmed in mice heterozygous for the *LacZ* knock-in allele (*Lrp4*<sup>+LacZ</sup>) by long-range PCR with combinations of primers, one of which is external to the homology arms (see the figure above). The strain was maintained as heterozygotes since mice homozygous for the allele are not viable.

*Lrp4* <sup>$\Delta$ ICD</sup> and *Lrp4*<sup>R1170W</sup> mice were generated by co-injecting a pX330 plasmid and an oligo donor with the desired mutation into FVB/N embryos. For each model, two founder mice were bred to wild-type FVB/N mice for germline transmission. Correct targeting was confirmed by PCR amplification and sequencing of the targeted regions from heterozygous mice (see the figure below). Primers used for the PCR are,  
*Lrp4* <sup>$\Delta$ ICD</sup>: 5'-TCCATCTGTCCCCAGCATC and 5'-CTTTCTCACCCACTCAGGCA  
*Lrp4*<sup>R1170W</sup>: 5'-GCTCACAGCATGAGGACATC and 5'-TGCTCCTATGCTTCATGGTC

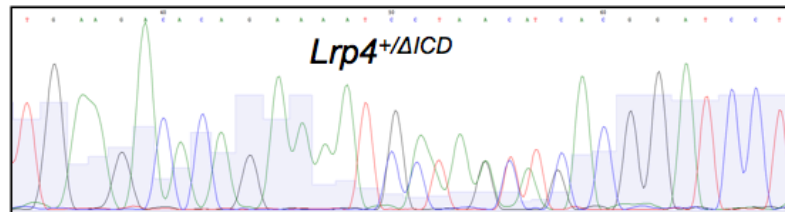

WT: TGAAGACACAGAAAATCCAAGTTCACGGATCCT  
 $\Delta$ ICD: TGAAGACACAGAAAATGATAACAGACGGATCCT

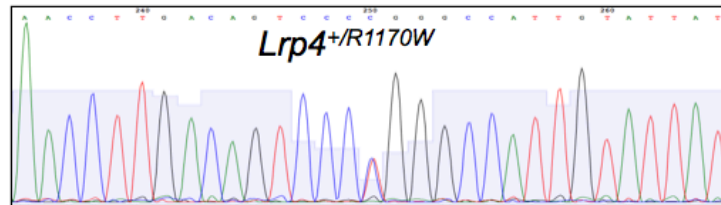

WT: AACCTTGACAGTCCCGGGGCCATTGTATTAT  
R1170W: AACCTTGACAGTCCCIGGGGCCATTGTATTAT

After successful germline transmission, heterozygous mice from individual founders were crossed to generate homozygous mice. Homozygous *Lrp4* <sup>$\Delta$ ICD</sup> and *Lrp4*<sup>R1170W</sup> mice are viable and two independent lines with the same mutation display tooth phenotypes indistinguishable from each other.

For generation of the *Lrp4*<sup>LacZ</sup>, *Lrp4* <sup>$\Delta$ ICD</sup>, *Lrp4*<sup>R1170W</sup> mice with CRISPR/Cas9 technology, seed sequences were carefully selected to minimize potential risk of off-target effect. Specifically, the selected seed sequences do not have any potential off-target with off-target score over 2.0 ([www.benchling.com](http://www.benchling.com)) across the whole mouse genome.

Ahn, Y., Sims, C., Logue, J.M., Weatherbee, S.D., Krumlauf, R., 2013. *Lrp4* and *Wise* interplay controls the formation and patterning of mammary and other skin appendage placodes by modulating Wnt signaling. *Development* 140, 583-593.

**Supplementary Table S1. Summary of mouse strains used in the study**

| Gene             | Allele                     | Modification/Purpose                                                      | Gene function    | Reference                    |
|------------------|----------------------------|---------------------------------------------------------------------------|------------------|------------------------------|
| <i>Lrp4</i>      | <i>mitt</i>                | Premature stop codon in exon 10                                           | null             | Weatherbee et al., 2006      |
| <i>Lrp4</i>      | <i>mte</i>                 | D1436G missense mutation                                                  | null             | Weatherbee et al., 2006      |
| <i>Lrp4</i>      | <i>LacZ</i>                | <i>LacZ</i> insertion into exon 1                                         | null             | this study                   |
| <i>Lrp4</i>      | <i>ECD</i>                 | Insertion of a stop codon before the transmembrane domain                 | hypomorphic      | Johnson et al., 2005         |
| <i>Lrp4</i>      | <i>mdig</i>                | A point mutations causing skipping of exon 15                             | hypomorphic      | Simon-Chazottes et al., 2006 |
| <i>Lrp4</i>      | <i>R1170W</i>              | R1170W missense mutation                                                  | hypomorphic      | this study                   |
| <i>Lrp4</i>      | $\Delta$ ICD               | Insertion of a stop codon after the transmembrane domain                  | hypomorphic      | this study                   |
| <i>Lrp4</i>      | <i>tetO-Lrp4</i>           | Random integration/tTA-dependent over-expression                          | gain-of-function | this study                   |
| <i>Lrp4-Lrp6</i> | <i>tetO-Lrp4ECDLrp6ICD</i> | Random integration/tTA-dependent over-expression                          | gain-of-function | this study                   |
| <i>Lrp4</i>      | <i>Lrp4BAC-tTA</i>         | Random integration/tTA expression from an <i>Lrp4</i> BAC clone           | tTA driver       | this study                   |
| <i>Lrp5</i>      | <i>null</i>                | Insertion of <i>IRES-LacZ-Neo</i> at amino acid 373                       | null             | Kato et al., 2002            |
| <i>Lrp6</i>      | <i>null</i>                | Insertion of <i>LacZ</i> at amino acid 321                                | null             | Pinson et al., 2000          |
| <i>Lrp6</i>      | <i>tetO-Lrp6</i>           | Random integration/tTA-dependent over-expression                          | gain-of-function | this study                   |
| <i>Wise</i>      | <i>null</i>                | <i>LacZ</i> insertion into exon 1                                         | null             | Ahn et al., 2010             |
| <i>Wise</i>      | <i>tetO-Wise</i>           | Random integration/tTA-dependent over-expression                          | gain-of-function | Ahn et al., 2013             |
| <i>KRT14</i>     | <i>K14-tTA</i>             | Random integration/tTA expression driven by a human <i>KRT14</i> promoter | tTA driver       | Ahn et al., 2013             |

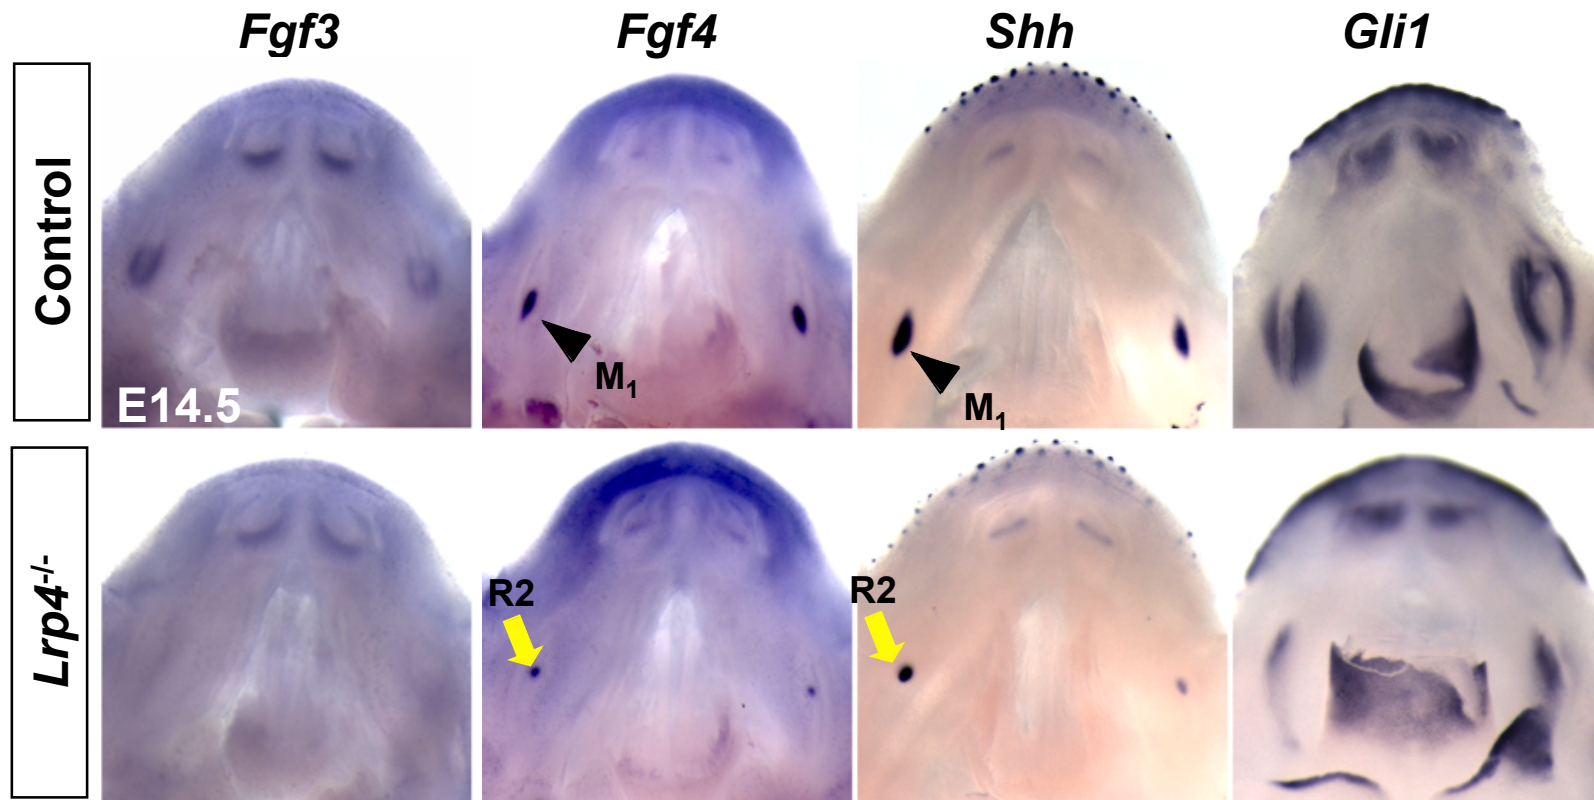

**Suppl. Fig. S1. Abnormal embryonic tooth development in *Lrp4*-null mice.**

Differential gene expression at E14.5 in the tooth germ of *Lrp4*-null mice shown by *in situ* hybridization with mandibles. Control mice are wild-type or heterozygous for either *Lrp4*<sup>mitt</sup> or *Lrp4*<sup>mte</sup> allele and *Lrp4*<sup>-/-</sup> mice are homozygous for either *Lrp4*<sup>mitt</sup> or *Lrp4*<sup>mte</sup> allele.

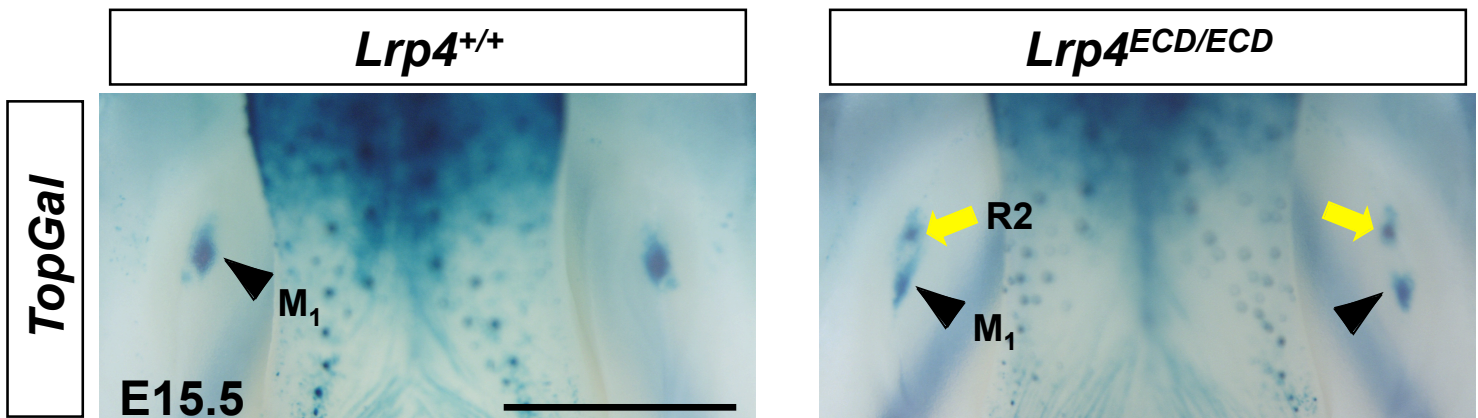

**Suppl. Fig. S2. Abnormal *TopGal* expression pattern in teeth of *Lrp4*<sup>ECD/ECD</sup> mice.**

*TopGal* staining indicates that R2 gives rise to a supernumerary tooth in *Lrp4*<sup>ECD/ECD</sup> mice. Similar to *Lrp4*-null mice, these mice display variable distance between R2 and M<sub>1</sub>. Scale bar 1 mm.

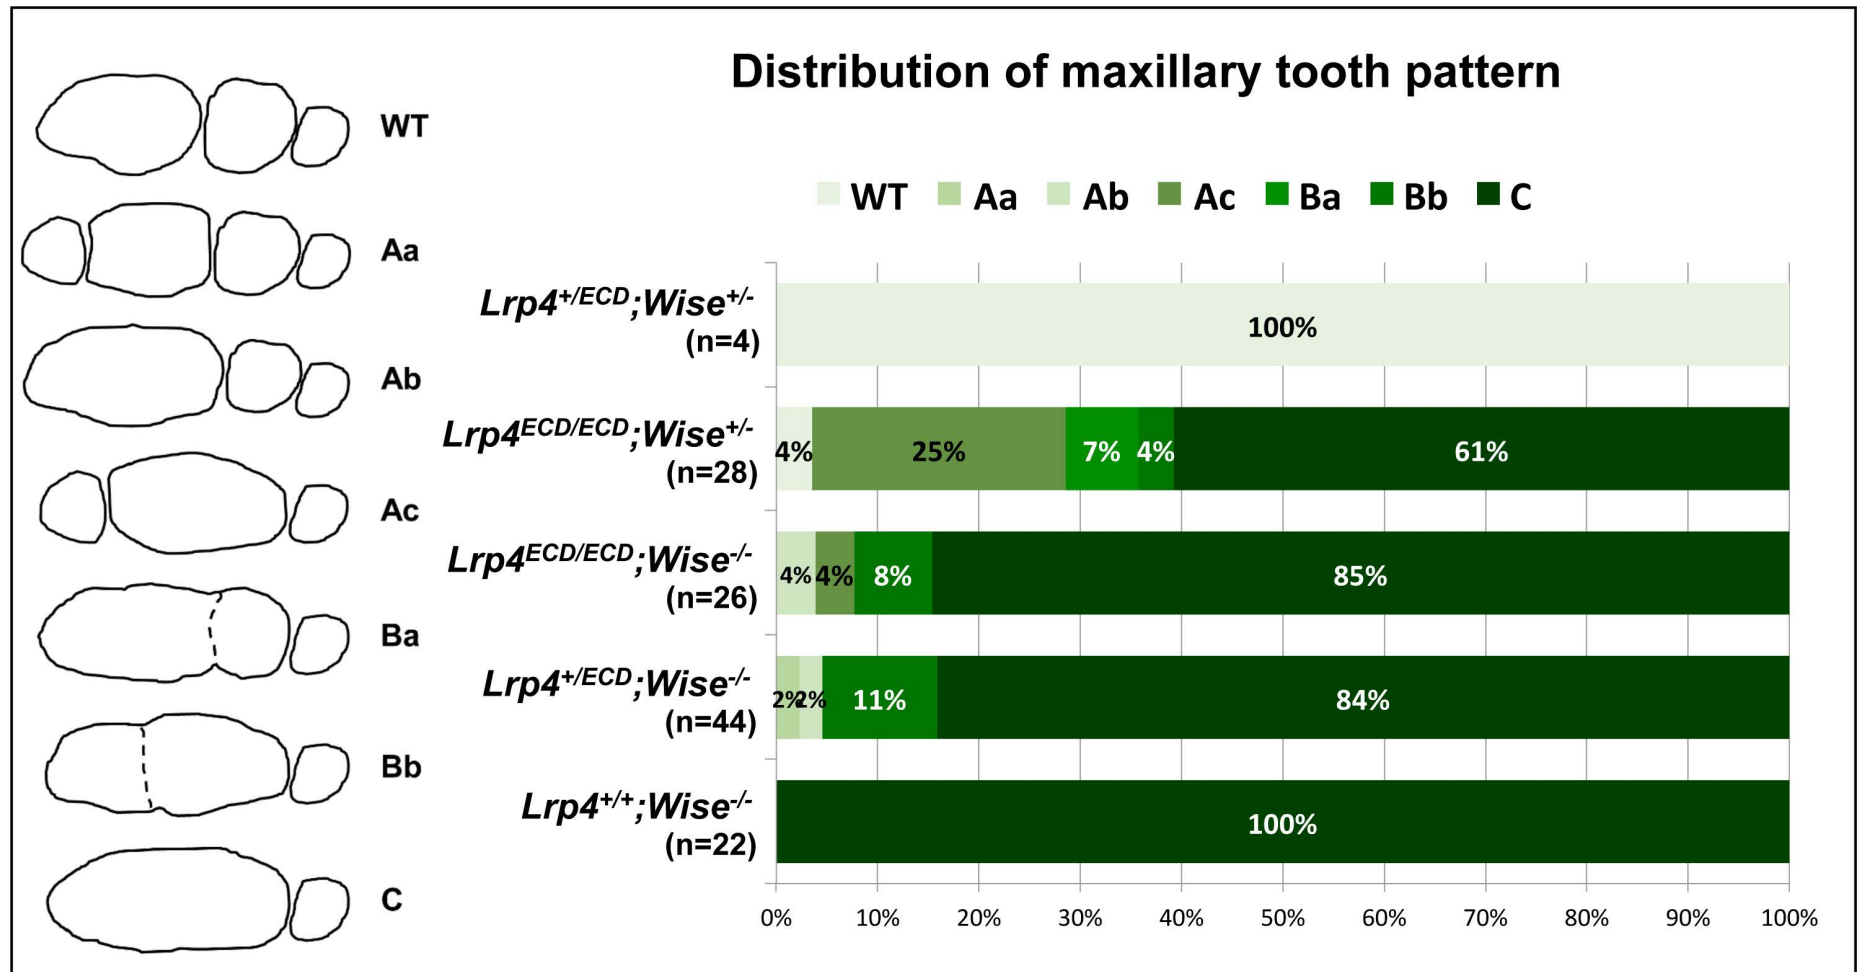

**Suppl. Fig. S3. *Lrp4* deficiency ameliorates *Wise*-null tooth defects in the maxilla.**

Maxillary tooth patterns are categorized based on the number, size and fusion of cheek teeth (left). Distribution of different tooth patterns among littermates of the *Lrp4*<sup>*ECD*</sup> and *Wise*-null combinatorial mutants (right).



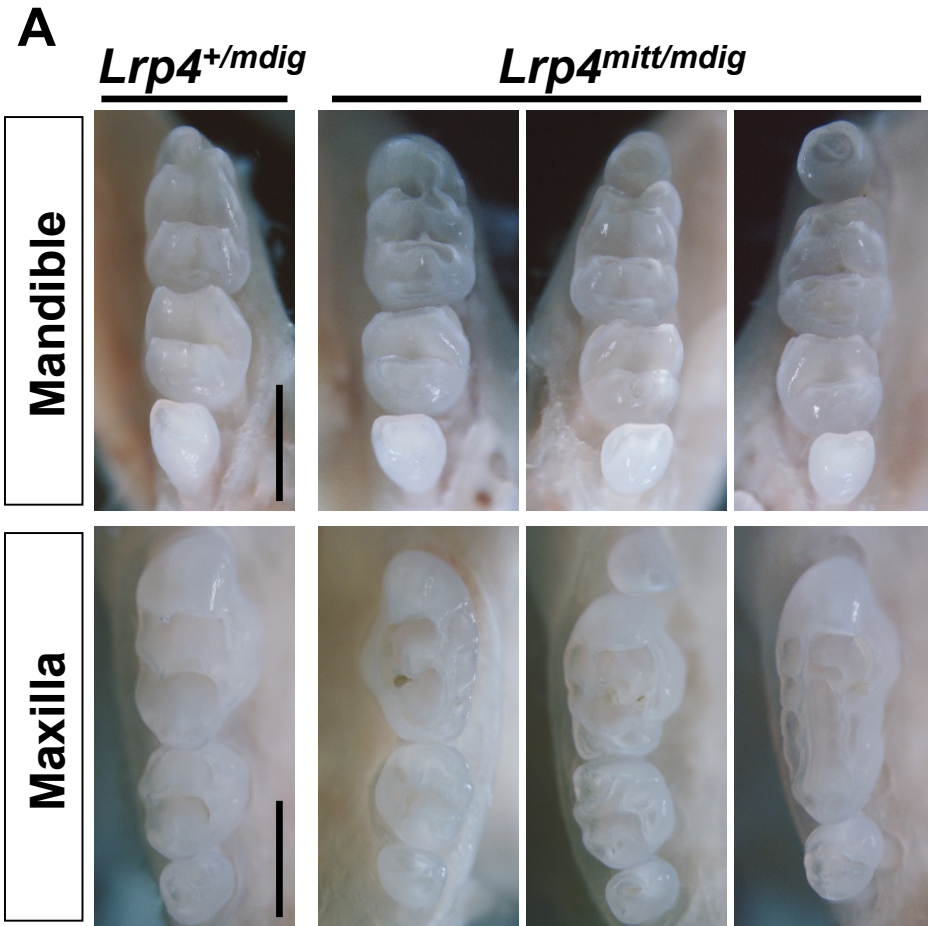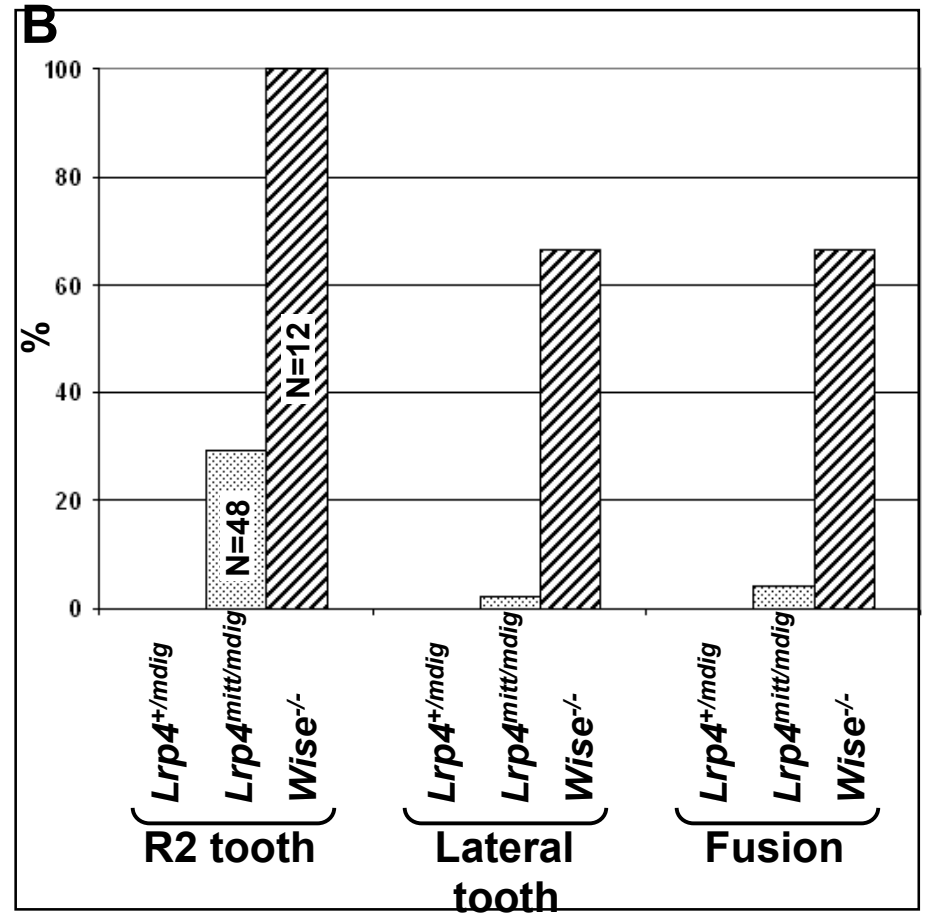

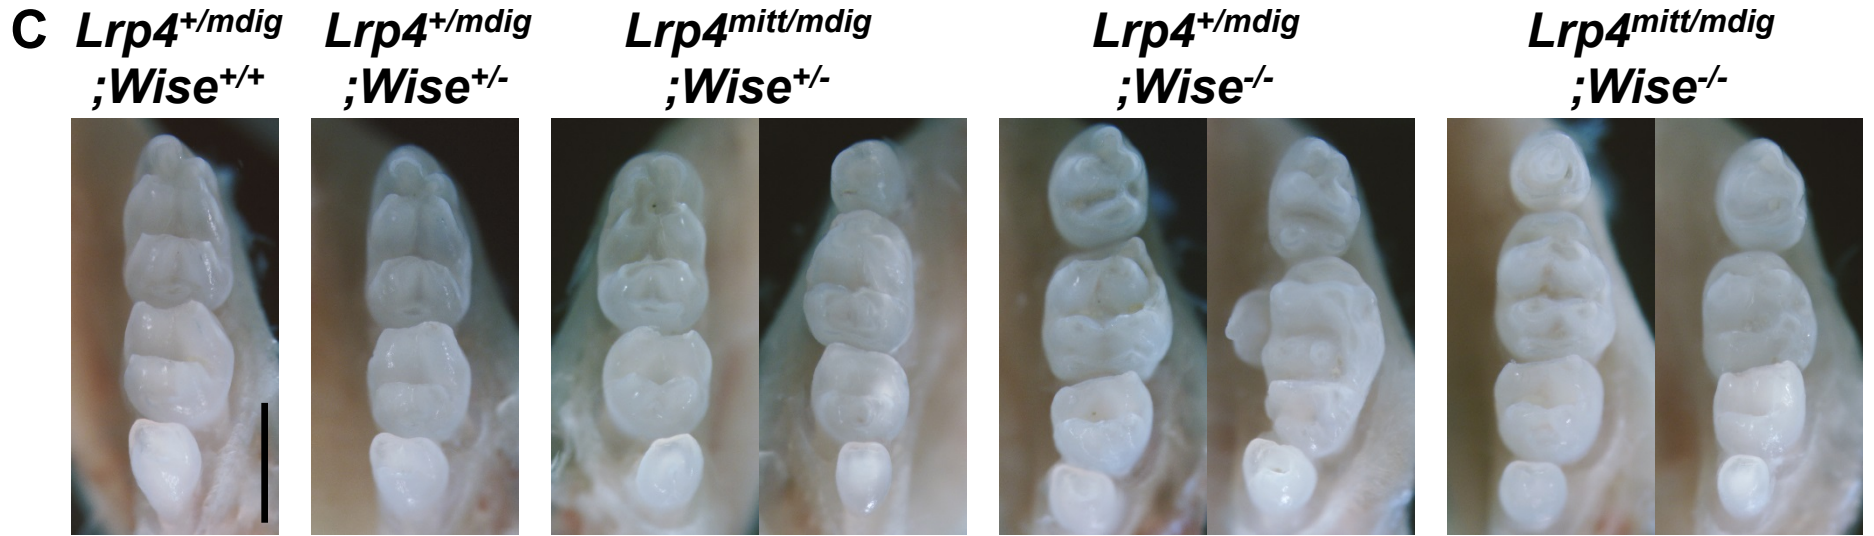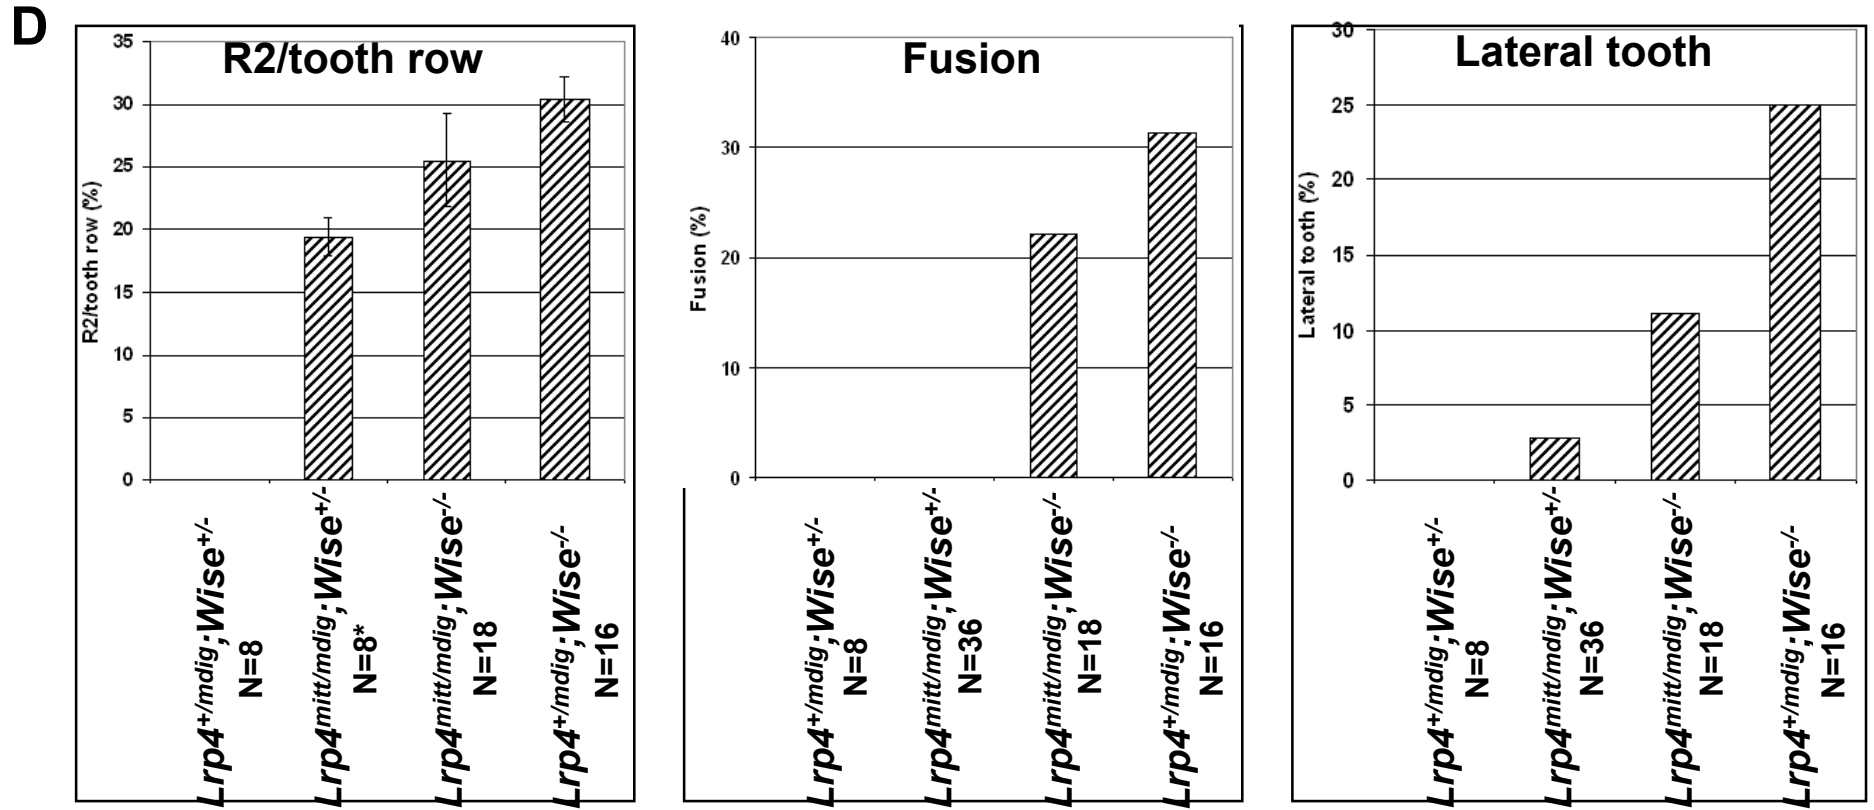



**Suppl. Fig. S4. *Lrp4* deficiency ameliorates *Wise*-null tooth defects.**

- (A) Representative tooth patterns of *Lrp4*<sup>mitt/mdig</sup> mice.
  - (B) *Lrp4*<sup>mitt/mdig</sup> mice display variable, but generally milder tooth defects in the mandible compared to *Wise*-null mice.
  - (C) Representative tooth patterns of *Lrp4* and *Wise* combinatorial mutants.
  - (D) *Lrp4* deficiency ameliorates tooth defects of *Wise*-null mice in a dose dependent manner in the mandible. Relative size of R2 (left) and frequency of molar fusion (middle) and lateral supernumerary teeth (right) per jaw quadrant were scored among littermates. \*: only 8 quadrants with a R2 tooth were scored and the others (28) had the normal three-molar pattern.
- Scale bar 1 mm.

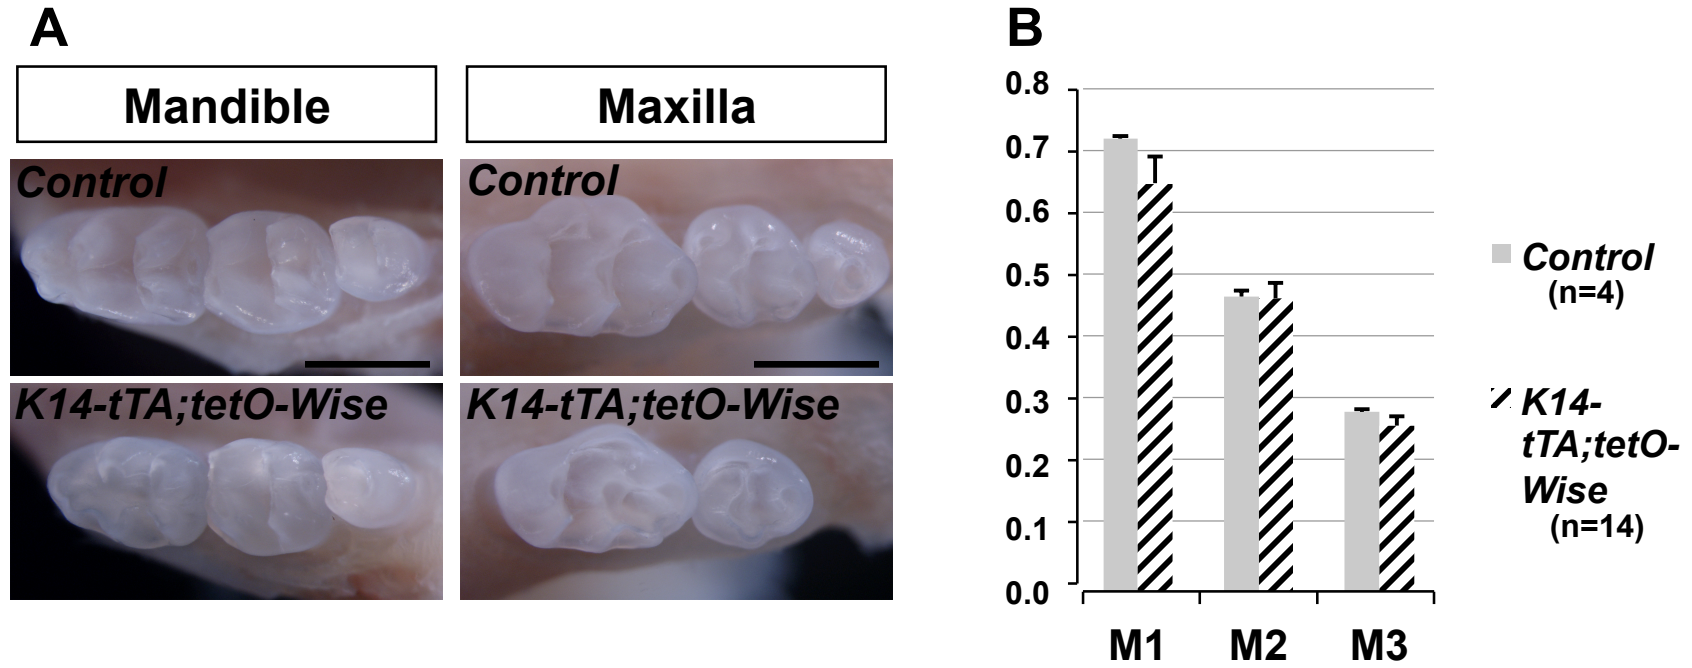

**Suppl. Fig. S5. Wise over-expression disrupts tooth development.**

(A) Molars are generally smaller and in the maxilla M<sub>3</sub> is often missing (28.6%, 4/14) in *K14-tTA;tetO-Wise* mice. Scale bar 1 mm.

(B) Mandibular M<sub>1</sub> and M<sub>3</sub> are significantly smaller in *K14-tTA;tetO-Wise* mice (M<sub>1</sub>: p=0.0036; M<sub>3</sub>: p=0.045) while M<sub>2</sub> are similar in size. Error bar: standard deviation

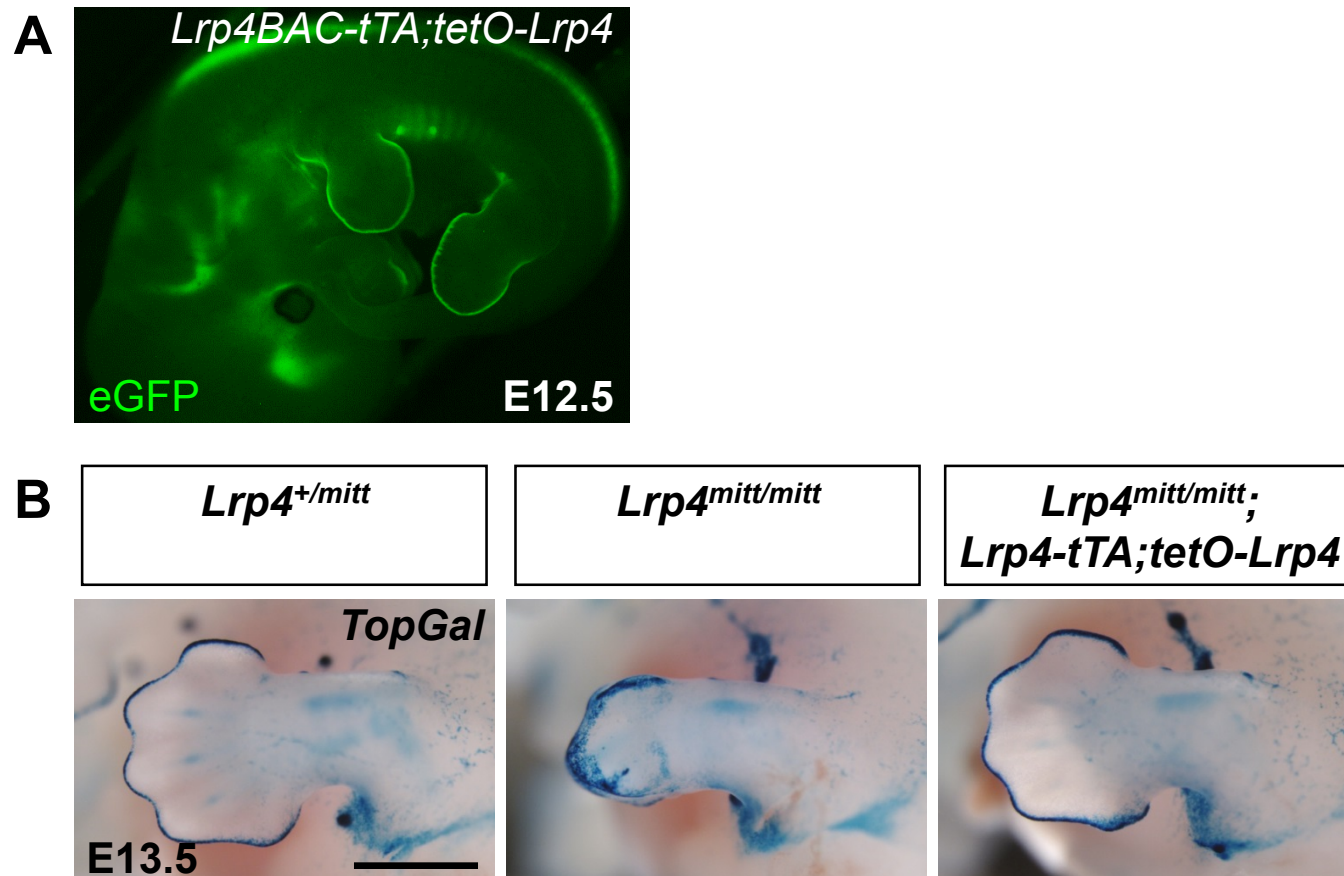

**Suppl. Fig. S6. Transgenic *Lrp4* expression rescues *Lrp4*-null limb defect.**

(A) eGFP expression driven by *Lrp4* BAC-tTA transgene which recapitulates the endogenous *Lrp4* expression pattern in the limb buds.

(B) *TopGal* expression indicates abnormal patterning of the distal limb in *Lrp4*<sup>*mitt*/*mitt*</sup> mice is rescued by transgenic *Lrp4* expression.

Scale bar 1 mm.

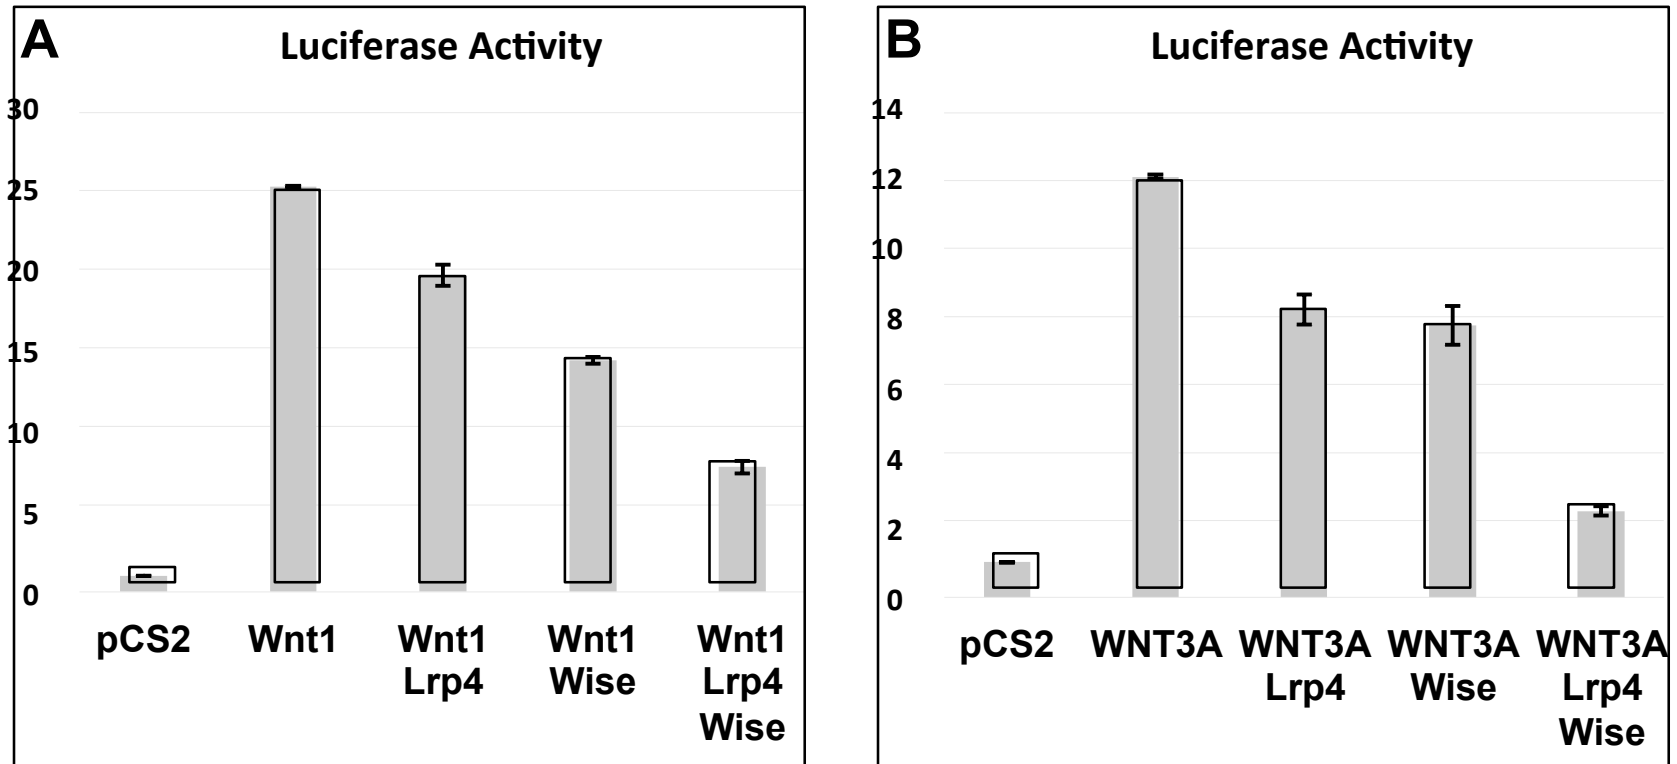

**Suppl. Fig. S7. *Lrp4* and *Wise* cooperatively inhibit Wnt/ $\beta$ -catenin signaling *in vitro*.**

(A) Relative luciferase activity from TOPflash reporter activated by Wnt1. HEK 293T cells were transfected with an empty vector (pCS2) or constructs driving expression of *Lrp4* or *Wise*.

(B) Relative luciferase activity from TOPflash reporter activated by WNT3A.

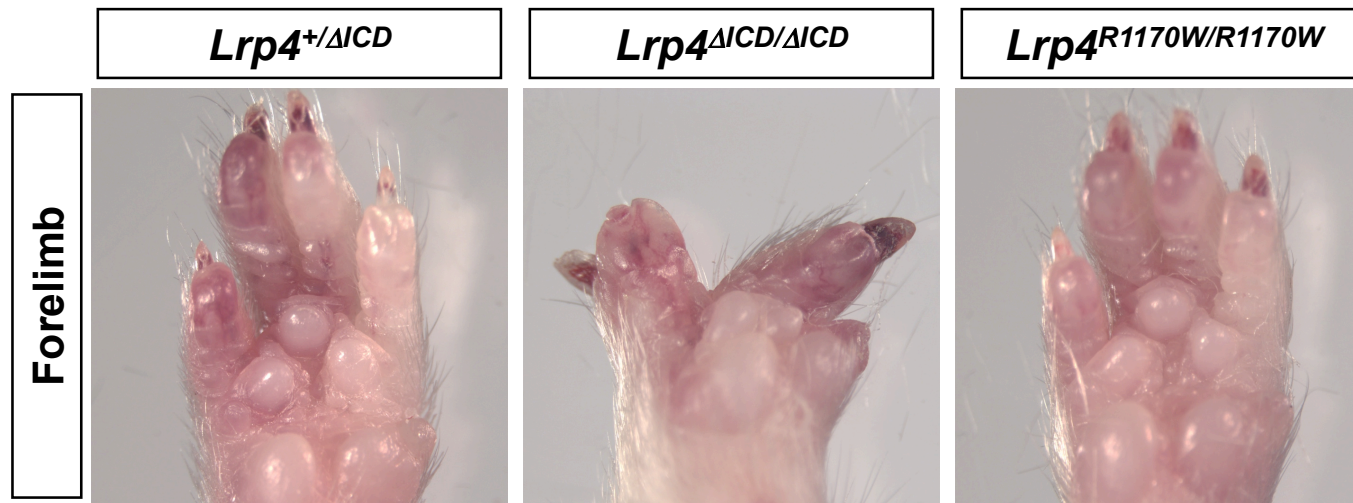

**Suppl. Fig. S8. Limb phenotypes of *Lrp4* <sup>$\Delta$ ICD/ $\Delta$ ICD</sup> and *Lrp4*<sup>R1170W/R1170W</sup> mice.**

While the intracellular domain is essential for distal limb patterning (middle), the R1170W mutation does not have significant effect on limb patterning (right).
